Published and Printed by The Company of Biologists Limited,  
Department of Zoology, University of Cambridge,  
Downing Street, Cambridge CB2 3EJ

© The Company of Biologists Limited 1989

## Errata

Primary culture of identified neurones from a cnidarian  
By JAN PRZYSIEZNIAK AND ANDREW N. SPENCER  
*J. exp. Biol.* **142**, 97–113.

Materials and methods. The fifth line from the bottom of the second paragraph reads 'digestion in collagenase (. . .) at 100 units ml<sup>-1</sup> . . .'.  
The concentration of collagenase should be 1000 units ml<sup>-1</sup>.

Kinematic analysis of symmetrical flight manoeuvres of Odonata  
By G. RÜPPELL  
*J. exp. Biol.* **144**, 13–42.

Due to a printer's error, Fig. 10 on p. 33 was reversed. A loose-leaf insertion of the corrected page can be found in this volume.

**This Publication  
is available in Microform**

**University Microfilms International**

300 North Zeeb Road, Dept. P.R., Ann Arbor, MI. 48106
